# Supplementary material
Source: PubMed Central journal article supplement (PMC3824719)
Supplement: mmc1.pdf [file mmc1.pdf]

## **Supporting Materials**

**Hydrodynamic determinants of cell necrosis and molecular delivery  
produced by pulsed laser microbeam irradiation of adherent cells**

**Biophysical Journal 2013**

Jonathan L. Compton, Amy N. Hellman, and Vasanth Venugopalan

**Table S1:** Values for sharpness  $S$  of the error function, plasma threshold energy  $E_{\text{th}}$ , and plasma threshold irradiance  $I_{\text{th}}$  for pulse durations of 180–1100 ps.

| Pulse duration<br>$t_p$ [ps] | Sharpness<br>$S$ [ $1/\mu\text{J}$ ] | Threshold Energy<br>$E_{\text{th}}$ [ $\mu\text{J}$ ] | Threshold Irradiance<br>$I_{\text{th}}$ [ $\text{W}/\text{mm}^2$ ] |
|------------------------------|--------------------------------------|-------------------------------------------------------|--------------------------------------------------------------------|
| 1100                         | $2.1 \pm 0.1$                        | $2.13 \pm 0.01$                                       | $3.76 \times 10^9$                                                 |
| 540                          | $2.9 \pm 0.2$                        | $1.21 \pm 0.01$                                       | $4.35 \times 10^9$                                                 |
| 360                          | $5.0 \pm 0.3$                        | $0.97 \pm 0.01$                                       | $5.21 \times 10^9$                                                 |
| 280                          | $6.7 \pm 0.6$                        | $0.86 \pm 0.01$                                       | $5.94 \times 10^9$                                                 |
| 180                          | $8.1 \pm 0.3$                        | $0.45 \pm 0.01$                                       | $4.85 \times 10^9$                                                 |

**Table S2:** Values for the maximum wall shear stress  $\tau_{w,\max}$  provided by the Gilmore model computed at  $R_{\text{necr}}$  and  $R_{\text{perm}}$  180, 540, and 1100 ps at energies corresponding to  $1\times$ ,  $2\times$ ,  $3\times$ , and  $5\times E_{\text{th}}$ . The mean and standard deviation  $\tau_{w,\max}$  for each pulse duration are also shown.

| Pulse Duration $t_p$ |              | $E_p$ [ $\mu$ J] | Maximum wall shear stress $\tau_{w,\max}$ [kPa] |                         |
|----------------------|--------------|------------------|-------------------------------------------------|-------------------------|
|                      |              |                  | @ $r = R_{\text{necr}}$                         | @ $r = R_{\text{perm}}$ |
| 180 ps               | 1× Threshold | 0.45             | 24 ± 7                                          | 12 ± 3                  |
|                      | 2× Threshold | 0.90             | 28 ± 5                                          | 15 ± 4                  |
|                      | 3× Threshold | 1.35             | 31 ± 6                                          | 12 ± 2                  |
|                      | 5× Threshold | 2.25             | 24 ± 5                                          | 11 ± 2                  |
| Mean±SD              |              |                  | 27 ± 6                                          | 13 ± 3                  |
| 540 ps               | 1× Threshold | 1.2              | 35 ± 7                                          | 13 ± 4                  |
|                      | 2× Threshold | 2.4              | 33 ± 6                                          | 9 ± 2                   |
|                      | 3× Threshold | 3.6              | 32 ± 5                                          | 8 ± 1                   |
|                      | 5× Threshold | 6.0              | 25 ± 4                                          | 8 ± 1                   |
| Mean±SD              |              |                  | 31 ± 6                                          | 10 ± 3                  |
| 1100 ps              | 1× Threshold | 2.1              | 34 ± 7                                          | 12 ± 3                  |
|                      | 2× Threshold | 4.2              | 24 ± 4                                          | 8 ± 2                   |
|                      | 3× Threshold | 6.3              | 22 ± 3                                          | 9 ± 2                   |
|                      | 5× Threshold | 10.5             | 17 ± 2                                          | 7 ± 1                   |
| Mean±SD              |              |                  | 24 ± 5                                          | 9 ± 2                   |
| 6 ns                 | 1× Threshold | 8.0              | 28 ± 5                                          | 12 ± 2                  |
|                      | 2× Threshold | 16.0             | 15 ± 3                                          | 6.2 ± 0.5               |
|                      | 3× Threshold | 24.0             | 15 ± 2                                          | 6.7 ± 0.5               |
|                      | 5× Threshold | 40.0             | 15 ± 1                                          | 6.2 ± 0.4               |
| Mean±SD              |              |                  | 18 ± 4                                          | 8 ± 1                   |

**Table S3:** Values for the shear impulse provided by the Gilmore computed at  $R_{\text{necr}}$  and  $R_{\text{perm}}$  for 180, 540, and 1100 ps at energies corresponding to  $1\times$ ,  $2\times$ ,  $3\times$ , and  $5\times E_{\text{th}}$ . The mean and standard deviation impulse for each pulse duration are also shown.

| Pulse Duration $t_p$ |              | $E_p$ [ $\mu\text{J}$ ] | Impulse, $J$ [ $\text{Pa s}$ ] |                                |
|----------------------|--------------|-------------------------|--------------------------------|--------------------------------|
|                      |              |                         | @ $r = R_{\text{necr}}$        | @ $r = R_{\text{perm}}$        |
| 180 ps               | 1× Threshold | 0.45                    | $(3.6 \pm 1) \times 10^{-2}$   | $(1.8 \pm 0.4) \times 10^{-2}$ |
|                      | 2× Threshold | 0.90                    | $(6.7 \pm 1) \times 10^{-2}$   | $(3.4 \pm 1) \times 10^{-2}$   |
|                      | 3× Threshold | 1.35                    | $(9 \pm 2) \times 10^{-2}$     | $(3.5 \pm 0.7) \times 10^{-2}$ |
|                      | 5× Threshold | 2.25                    | $(8.5 \pm 2) \times 10^{-2}$   | $(3.8 \pm 0.7) \times 10^{-2}$ |
| Mean±SD              |              |                         | $(7 \pm 2) \times 10^{-2}$     | $(3.0 \pm 0.8) \times 10^{-2}$ |
| 540 ps               | 1× Threshold | 1.2                     | $(9 \pm 2) \times 10^{-2}$     | $(3 \pm 1) \times 10^{-2}$     |
|                      | 2× Threshold | 2.4                     | $(11 \pm 2) \times 10^{-2}$    | $(3.1 \pm 0.7) \times 10^{-2}$ |
|                      | 3× Threshold | 3.6                     | $(13 \pm 2) \times 10^{-2}$    | $(3.2 \pm 0.4) \times 10^{-2}$ |
|                      | 5× Threshold | 6.0                     | $(13 \pm 2) \times 10^{-2}$    | $(3.8 \pm 0.6) \times 10^{-2}$ |
| Mean±SD              |              |                         | $(12 \pm 2) \times 10^{-2}$    | $(3.3 \pm 0.8) \times 10^{-2}$ |
| 1100 ps              | 1× Threshold | 2.1                     | $(10 \pm 2) \times 10^{-2}$    | $(4 \pm 1) \times 10^{-2}$     |
|                      | 2× Threshold | 4.2                     | $(10 \pm 2) \times 10^{-2}$    | $(3.4 \pm 0.7) \times 10^{-2}$ |
|                      | 3× Threshold | 6.3                     | $(11 \pm 1) \times 10^{-2}$    | $(4.1 \pm 0.7) \times 10^{-2}$ |
|                      | 5× Threshold | 10.5                    | $(10 \pm 1) \times 10^{-2}$    | $(4.1 \pm 0.4) \times 10^{-2}$ |
| Mean±SD              |              |                         | $(10 \pm 2) \times 10^{-2}$    | $(3.8 \pm 0.8) \times 10^{-2}$ |
| 6 ns                 | 1× Threshold | 8.0                     | $(11 \pm 2) \times 10^{-2}$    | $(4.5 \pm 0.7) \times 10^{-2}$ |
|                      | 2× Threshold | 16.0                    | $(7 \pm 2) \times 10^{-2}$     | $(2.8 \pm 0.2) \times 10^{-2}$ |
|                      | 3× Threshold | 24.0                    | $(10 \pm 1) \times 10^{-2}$    | $(4.2 \pm 0.3) \times 10^{-2}$ |
|                      | 5× Threshold | 40.0                    | $(12 \pm 1) \times 10^{-2}$    | $(5.0 \pm 0.3) \times 10^{-2}$ |
| Mean±SD              |              |                         | $(10 \pm 2) \times 10^{-2}$    | $(4.1 \pm 0.5) \times 10^{-2}$ |

**Table S4:** Laser pulse energy ( $E_p$ ), mechanical bubble energy ( $E_B$ ), bubble transduction efficiency ( $E_B/E_p$ ), number of necrotic cells, number of permeabilized cells, and the ratio of permeabilized cells to necrotic cells for pulse durations of 180, 540, and 1100 ps at energies corresponding to  $1\times$ ,  $2\times$ ,  $3\times$ , and  $5\times E_{th}$ .

| Pulse Duration<br>$t_p$ [ps] | $E_p/E_{th}$<br>[-] | $E_p$<br>[ $\mu$ J] | $E_B$<br>[ $\mu$ J] | $E_B/E_p$<br>[%] | # Necrotic Cells | # Injected Cells | Inj./Necr. Cells |
|------------------------------|---------------------|---------------------|---------------------|------------------|------------------|------------------|------------------|
| 180 ps                       | 1                   | 0.45                | 0.02                | 3.92             | 4 $\pm$ 1        | 4 $\pm$ 2        | 1.04             |
|                              | 2                   | 0.90                | 0.07                | 8.24             | 7 $\pm$ 1        | 6 $\pm$ 4        | 0.94             |
|                              | 3                   | 1.35                | 0.14                | 10.1             | 8 $\pm$ 2        | 13 $\pm$ 5       | 1.59             |
|                              | 5                   | 2.25                | 0.27                | 11.9             | 15 $\pm$ 3       | 18 $\pm$ 8       | 1.23             |
| 540 ps                       | 1                   | 1.2                 | 0.10                | 8.51             | 6 $\pm$ 1        | 10 $\pm$ 5       | 1.80             |
|                              | 2                   | 2.4                 | 0.25                | 10.6             | 10 $\pm$ 2       | 27 $\pm$ 9       | 2.66             |
|                              | 3                   | 3.6                 | 0.44                | 12.4             | 14 $\pm$ 2       | 44 $\pm$ 9       | 3.19             |
|                              | 5                   | 6.0                 | 0.85                | 14.2             | 24 $\pm$ 5       | 56 $\pm$ 16      | 2.34             |
| 1100 ps                      | 1                   | 2.1                 | 0.17                | 7.83             | 8 $\pm$ 2        | 15 $\pm$ 7       | 1.84             |
|                              | 2                   | 4.2                 | 0.44                | 10.4             | 20 $\pm$ 4       | 39 $\pm$ 14      | 1.93             |
|                              | 3                   | 6.3                 | 0.71                | 11.2             | 25 $\pm$ 4       | 39 $\pm$ 13      | 1.58             |
|                              | 5                   | 10.5                | 1.29                | 12.1             | 42 $\pm$ 7       | 55 $\pm$ 16      | 1.32             |
